# Supplementary material for: Bidentate Ru(ii)-NC complexes as catalysts for the dehydrogenative reaction from primary alcohols to carboxylic acids
Source: Royal Society of Chemistry journal article supplement (doi:10.1039/c9dt01414d), 2019-01-01
Supplement: c9dt01414d1.pdf [file c9dt01414d1.pdf]

## **Bidentate Ru(II)-NC complexes as catalysts for the dehydrogenative reaction from primary alcohols to carboxylic acids**

Dawei Gong,<sup>†</sup> Bowen Hu,<sup>†</sup> and Dafa Chen<sup>\*,†</sup>

<sup>†</sup> MIIT Key Laboratory of Critical Materials Technology for New Energy Conversion and Storage,  
School of Chemical Engineering & Technology, Harbin Institute of Technology, Harbin 150001,  
People's Republic of China.

### Table of Contents

|                                               |     |
|-----------------------------------------------|-----|
| Control Experiment                            | S2  |
| Crystallographic Details                      | S3  |
| IR Spectra                                    | S4  |
| NMR Spectra of Organometallic Complexes       | S8  |
| <sup>1</sup> H NMR Spectra of Carboxylic Acid | S18 |

## Control Experiment

**Table S1.** Intermediates **6-8** as catalysts for catalytic reaction in different time.

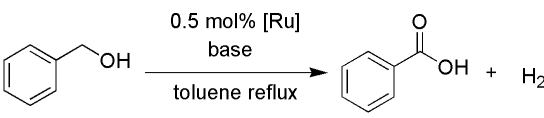

| Entry | [Ru]     | time | Conversion (%) <sup>a</sup> |
|-------|----------|------|-----------------------------|
| 1     | <b>1</b> | 1h   | 29                          |
| 2     | <b>1</b> | 2h   | 51                          |
| 3     | <b>1</b> | 4h   | 80                          |
| 4     | <b>1</b> | 6h   | 91                          |
| 5     | <b>6</b> | 1h   | 30                          |
| 6     | <b>6</b> | 2h   | 53                          |
| 7     | <b>6</b> | 4h   | 80                          |
| 8     | <b>6</b> | 6h   | 91                          |
| 9     | <b>7</b> | 1h   | 29                          |
| 10    | <b>7</b> | 2h   | 52                          |
| 11    | <b>7</b> | 4h   | 80                          |
| 12    | <b>7</b> | 6h   | 90                          |
| 13    | <b>8</b> | 1h   | 20                          |
| 14    | <b>8</b> | 2h   | 35                          |
| 15    | <b>8</b> | 4h   | 52                          |
| 16    | <b>8</b> | 6h   | 65                          |

Reaction conditions: benzyl alcohol (2 mmol), base (3 mmol), toluene (6 mL), N<sub>2</sub>, catalyst (0.5 mol%), 120 °C, the conversion was calculated by GC using dodecane (1 mmol) as the internal standard.

## Crystallographic Details

**3:** A total of 18755 reflections ( $-14 \leq h \leq 15$ ,  $-15 \leq k \leq 16$ ,  $-23 \leq l \leq 22$ ) were collected at  $T = 120(2)$  K in the range of  $5.818$  to  $58.142^\circ$  of which 10223 were unique ( $R_{\text{int}} = 0.0316$ ); Mo $_{\text{K}}$  radiation ( $\lambda = 0.71073$  Å). The structure was solved by the direct methods. All non-hydrogen atoms were refined anisotropically, and hydrogen atoms were placed in calculated idealized positions. The residual peak and hole electron densities were  $0.44$  and  $-0.52$  eÅ $^{-3}$ , respectively. The least squares refinement converged normally with residuals of  $R(F) = 0.0525$ ,  $wR(F^2) = 0.0987$  and a GOF =  $0.980$  ( $>2\sigma(I)$ ). C $_{51}$ H $_{40}$ ClNOP $_2$ Ru, Mw =  $881.30$ , space group Pnma, Orthorhombic,  $a = 11.5301(6)$ ,  $b = 12.0841(8)$ ,  $c = 17.3369(12)$  Å,  $V = 2261.7(3)$  Å $^3$ ,  $Z = 2$ ,  $\rho_{\text{calcd}} = 1.294$  Mg/m $^3$ . CCDC-1890662 contains the supplementary crystallographic data for this paper. These data can be obtained free of charge from The Cambridge Crystallographic Data Centre via [www.ccdc.cam.ac.uk/data\\_request/cif](http://www.ccdc.cam.ac.uk/data_request/cif).

**7:** A total of 58791 reflections ( $-14 \leq h \leq 14$ ,  $-32 \leq k \leq 57$ ,  $-26 \leq l \leq 27$ ) were collected at  $T = 120(10)$  K in the range of  $5.612^\circ$  to  $58.104^\circ$  of which 29481 were unique ( $R_{\text{int}} = 0.0534$ ); Mo $_{\text{K}}$  radiation ( $\lambda = 0.71073$  Å). The structure was solved by the direct methods. All non-hydrogen atoms were refined anisotropically, and hydrogen atoms were placed in calculated idealized positions. The residual peak and hole electron densities were  $0.666$  and  $-0.591$  eÅ $^{-3}$ , respectively. The least squares refinement converged normally with residuals of  $R(F) = 0.0709$ ,  $wR(F^2) = 0.0956$  and a GOF =  $1.038$  ( $>2\sigma(I)$ ). C $_{117}$ H $_{94}$ Cl $_8$ N $_2$ O $_6$ P $_4$ Ru $_2$ , Mw =  $1949.96$ , space group P2 $_1$ , Orthorhombic,  $a = 10.7582(2)$ ,  $b = 43.2244(8)$ ,  $c = 19.8552(3)$  Å,  $V = 9231.8(2)$  Å $^3$ ,  $Z = 4$ ,  $\rho_{\text{calcd}} = 1.403$  Mg/m $^3$ . CCDC-1890663 contains the supplementary crystallographic data for this paper. These data can be obtained free of charge from The Cambridge Crystallographic Data Centre via [www.ccdc.cam.ac.uk/data\\_request/cif](http://www.ccdc.cam.ac.uk/data_request/cif).

## IR Spectra

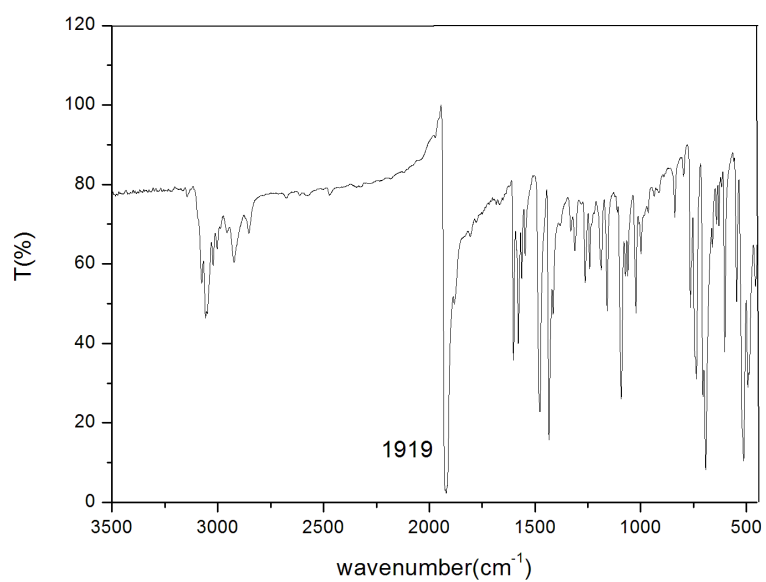

Figure S1. IR spectrum of **1**

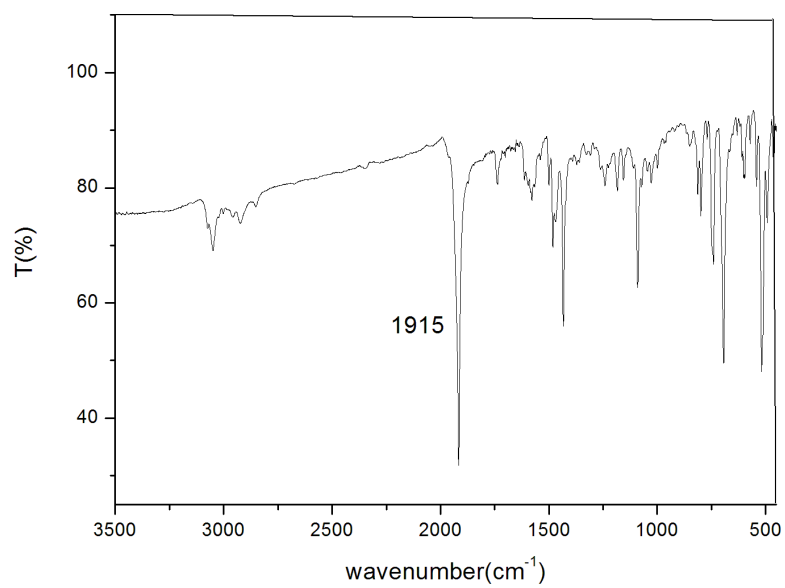

Figure S2. IR spectrum of **2**

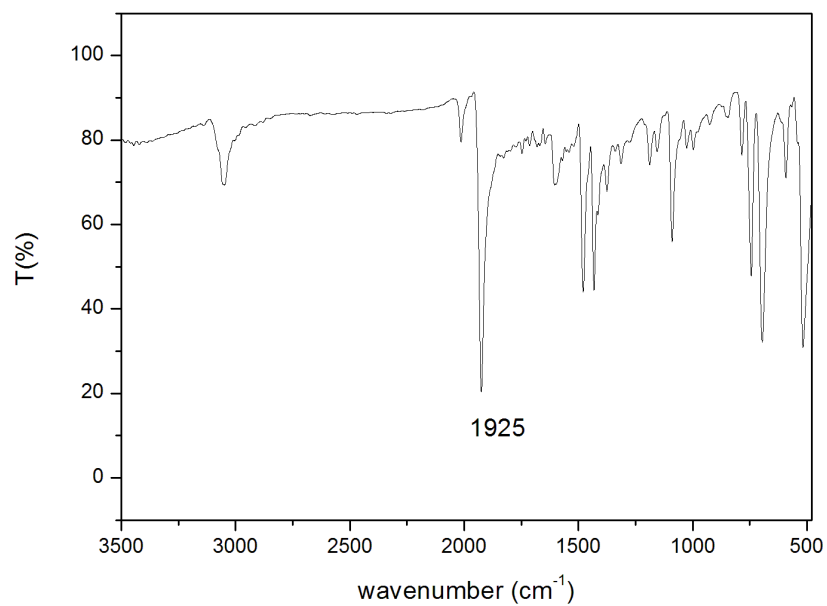

Figure S3. IR spectrum of **3**

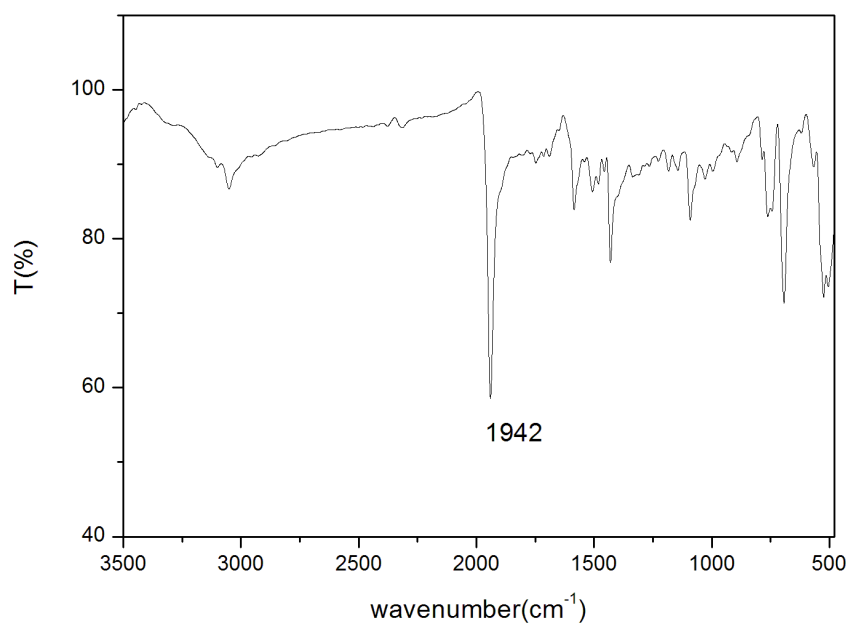

Figure S4. IR spectrum of **4**

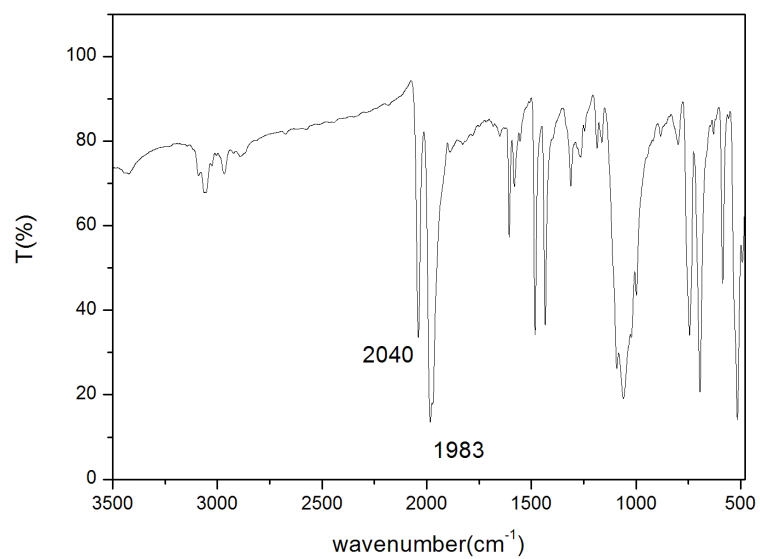

Figure S5. IR spectrum of **5**

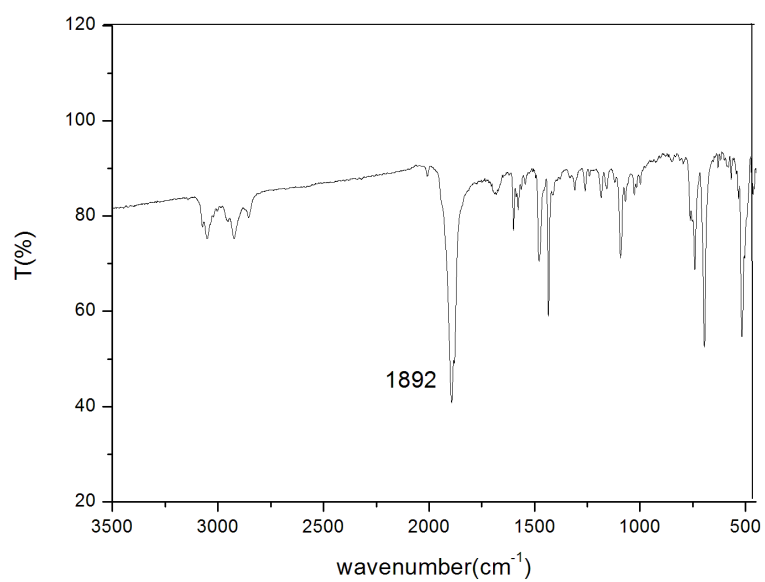

Figure S6. IR spectrum of **6**

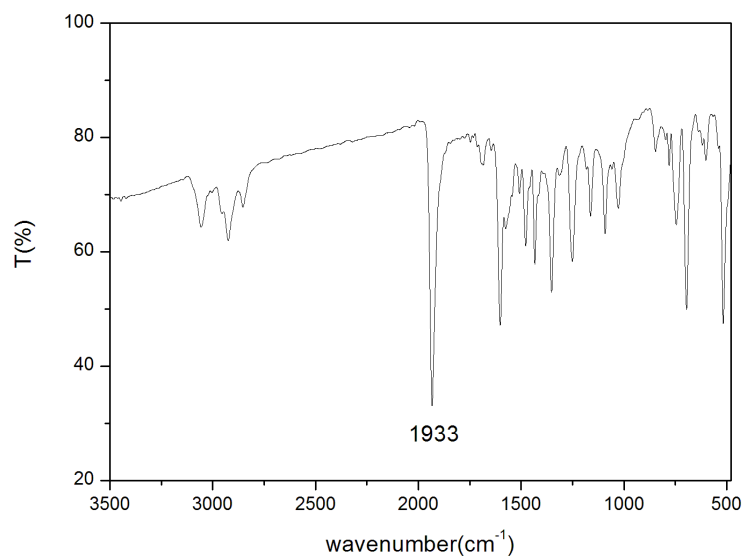

Figure S7. IR spectrum of **7**

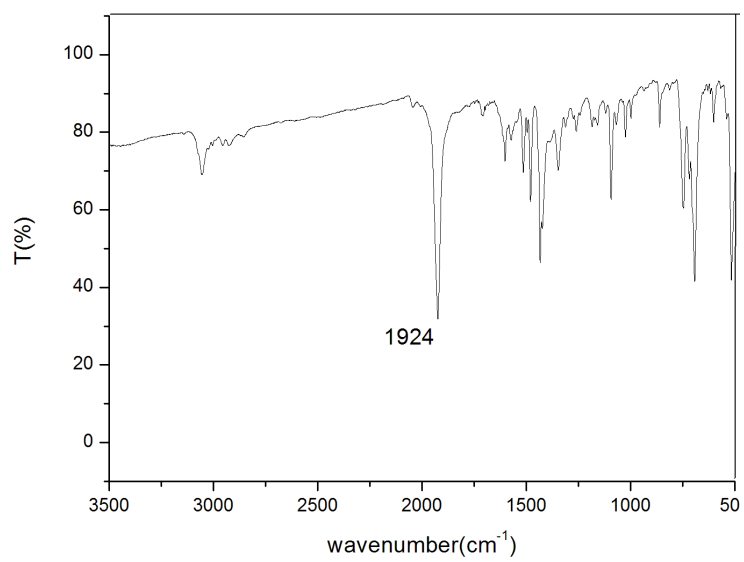

Figure S8. IR spectrum of **8**

## NMR Spectra of the Orgaonometallic Complexes

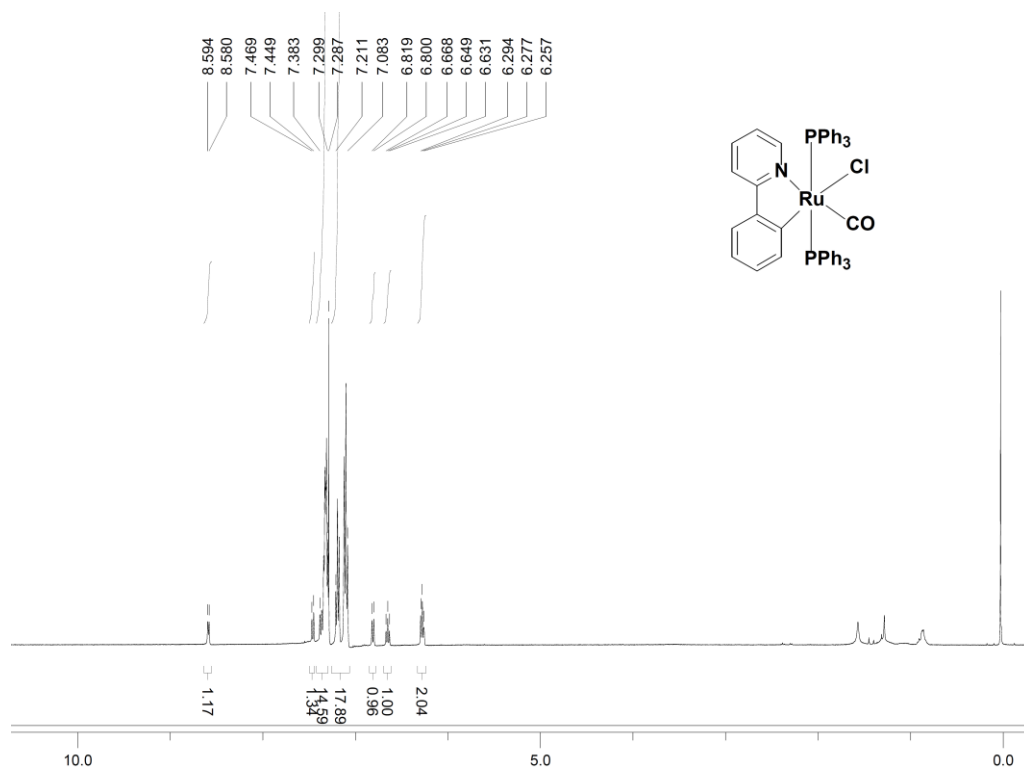

Figure S9. <sup>1</sup>H NMR spectrum of **1** in CDCl<sub>3</sub>

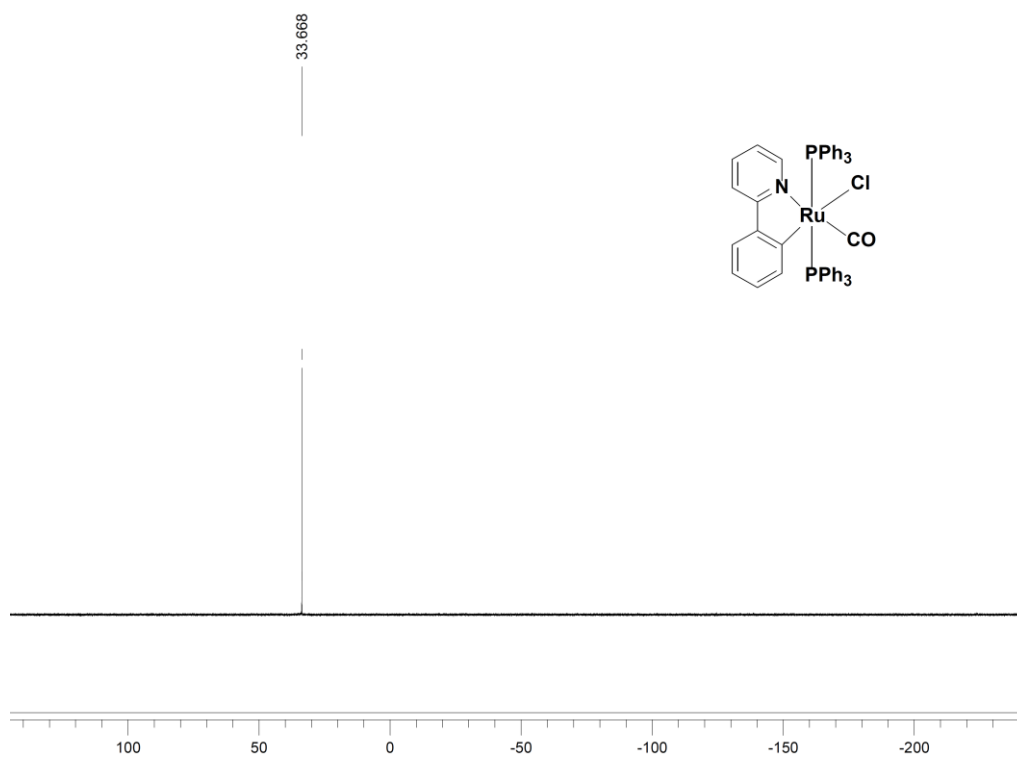

Figure S10. <sup>31</sup>P NMR spectrum of **1** in CDCl<sub>3</sub>.

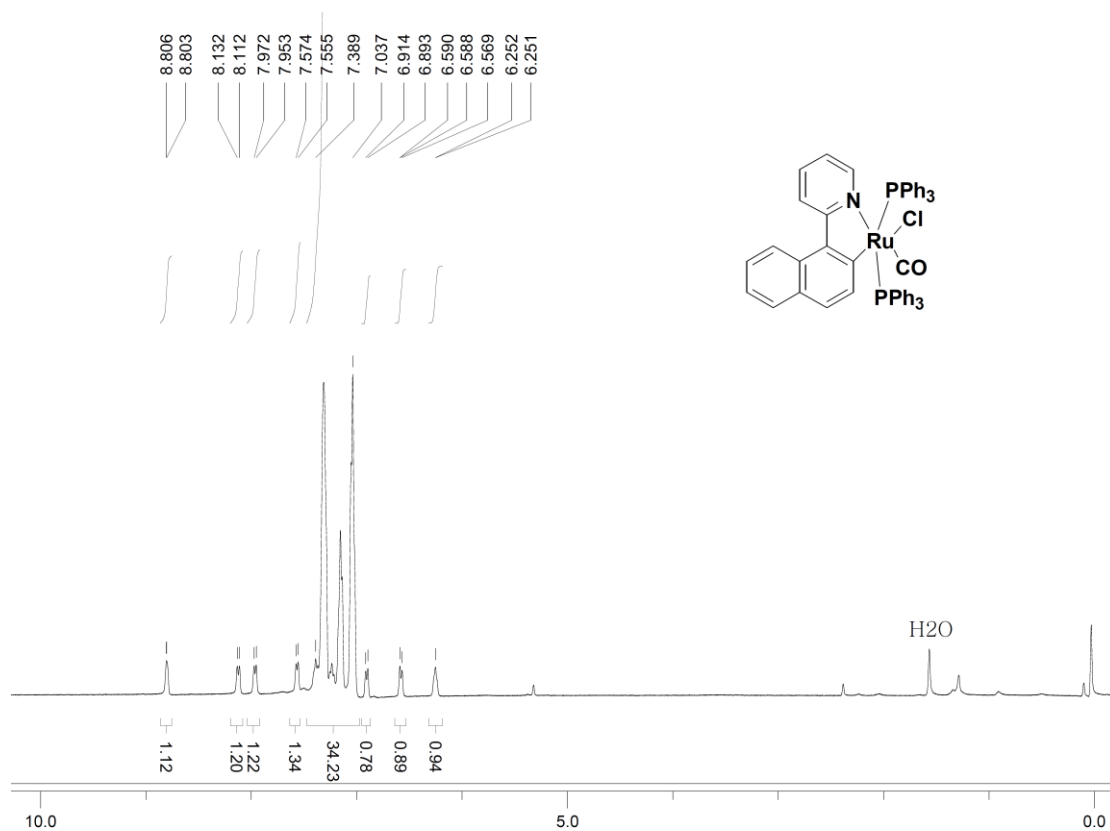

Figure S11. <sup>1</sup>H NMR spectrum of **2** in CDCl<sub>3</sub>

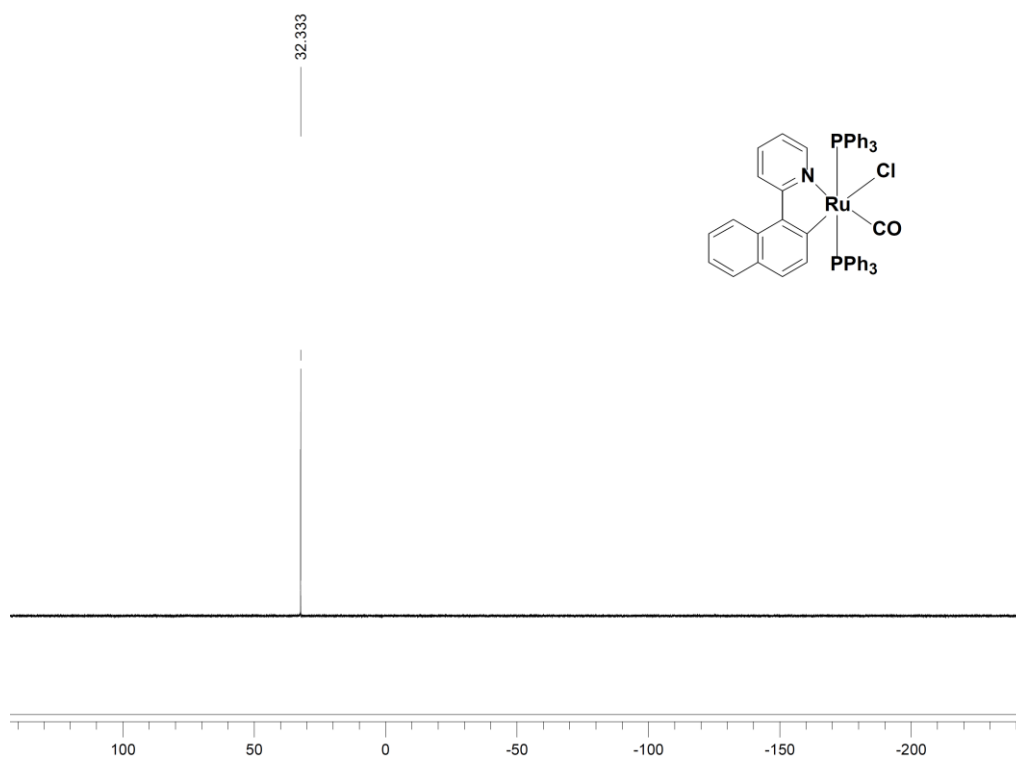

Figure S12. <sup>31</sup>P NMR spectrum of **2** in CDCl<sub>3</sub>.

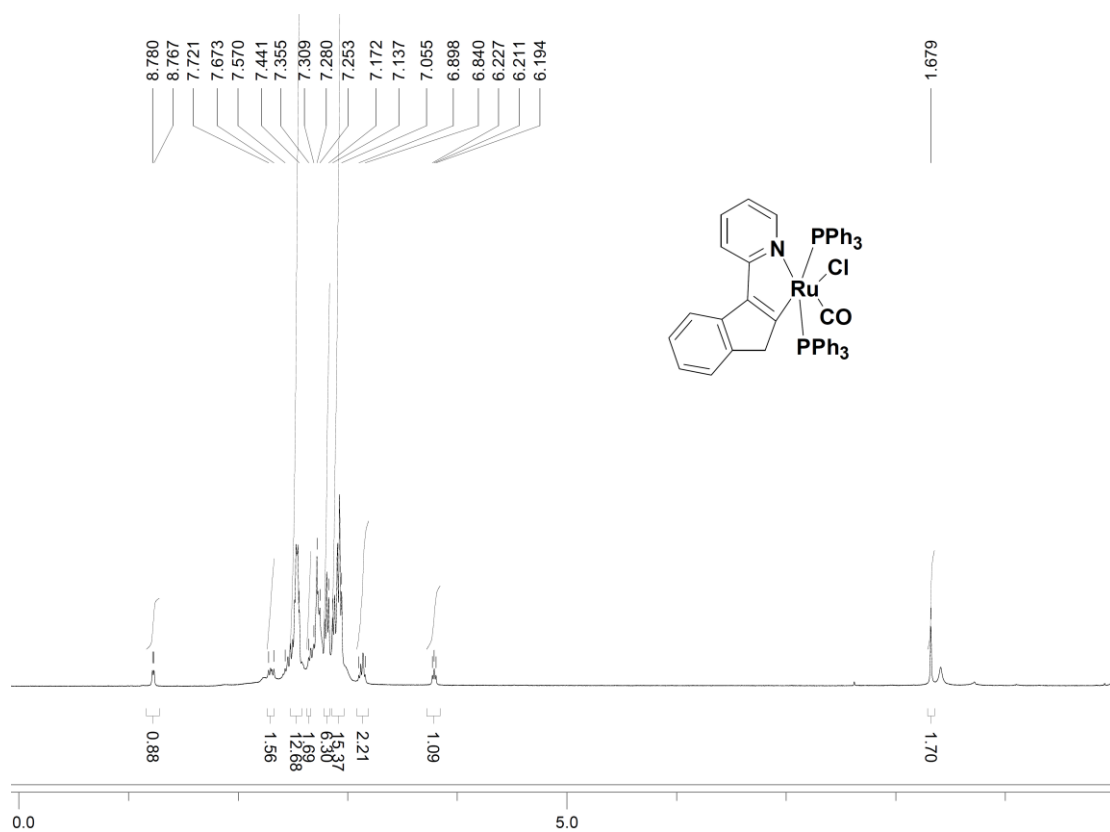

Figure S13. <sup>1</sup>H NMR spectrum of **3** in CDCl<sub>3</sub>

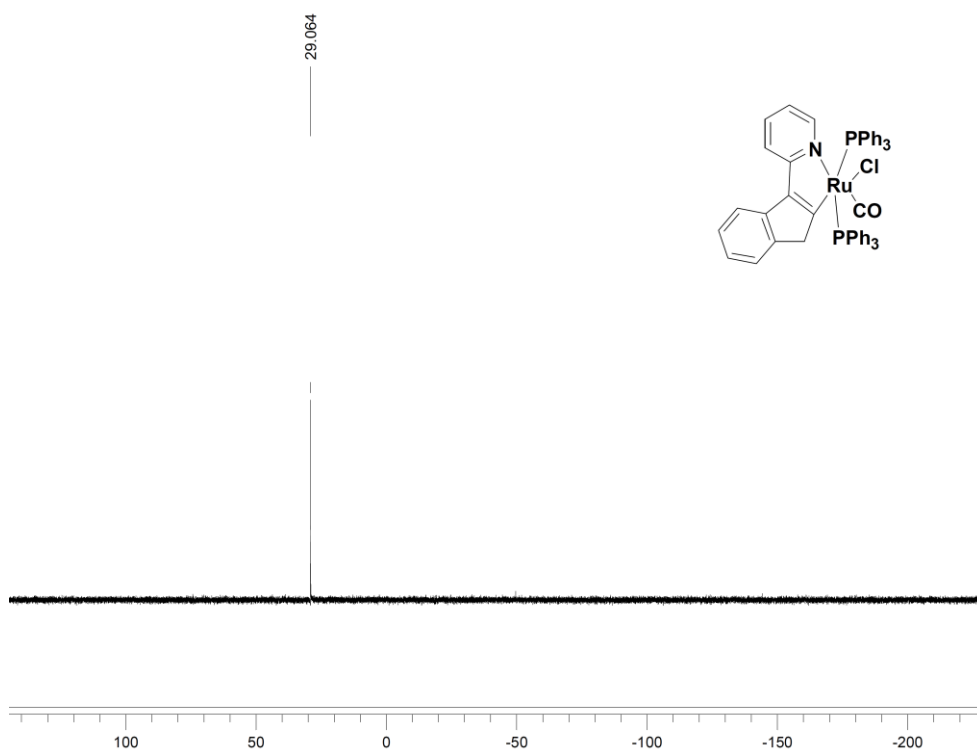

Figure S14. <sup>31</sup>P NMR spectrum of **3** in CDCl<sub>3</sub>.

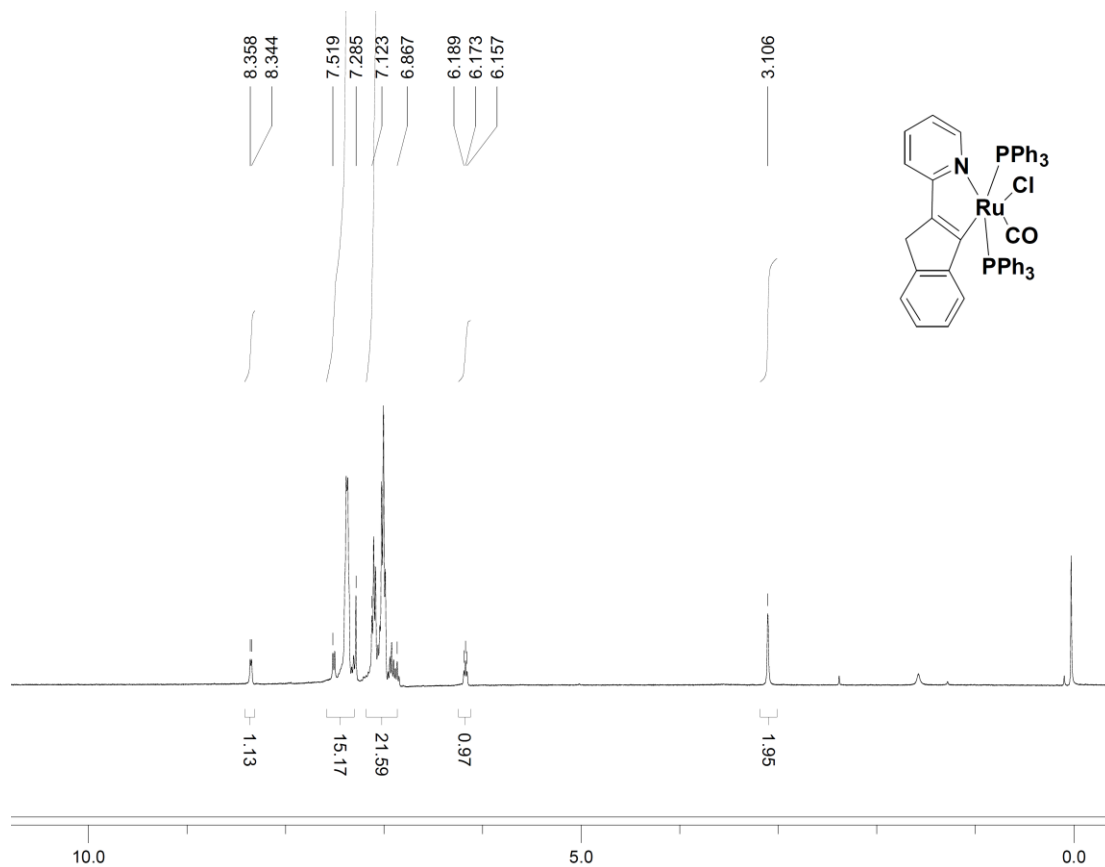

Figure S15. <sup>1</sup>H NMR spectrum of **4** in CDCl<sub>3</sub>

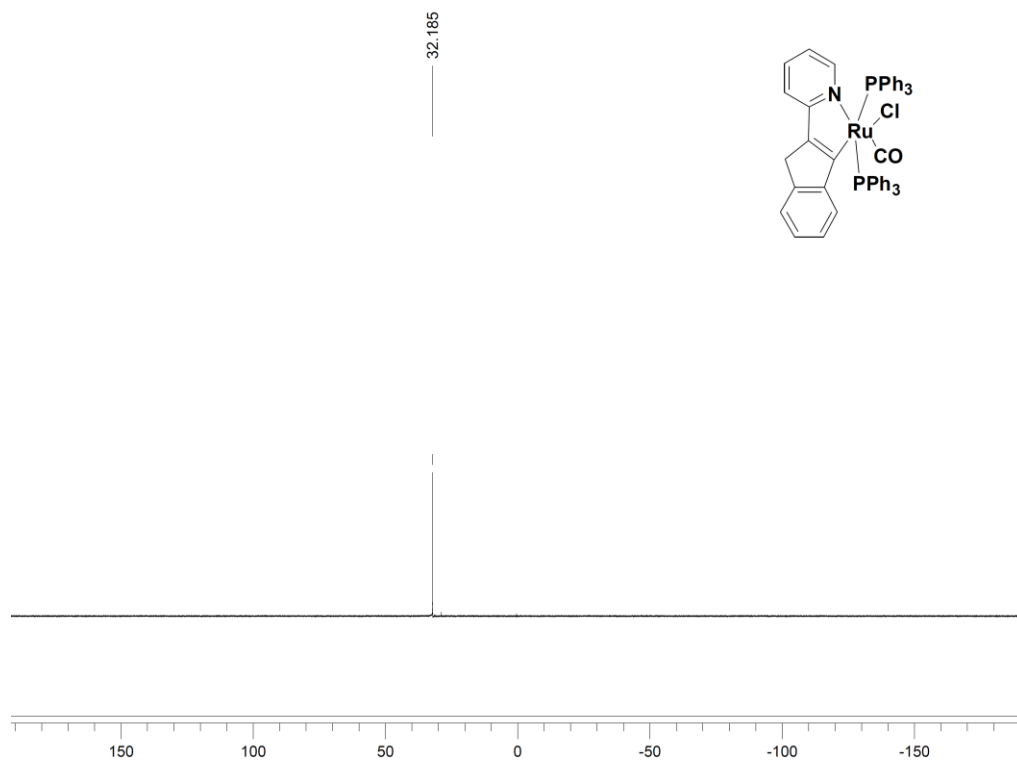

Figure S16. <sup>31</sup>P{<sup>1</sup>H} NMR spectrum of **4** in CDCl<sub>3</sub>.

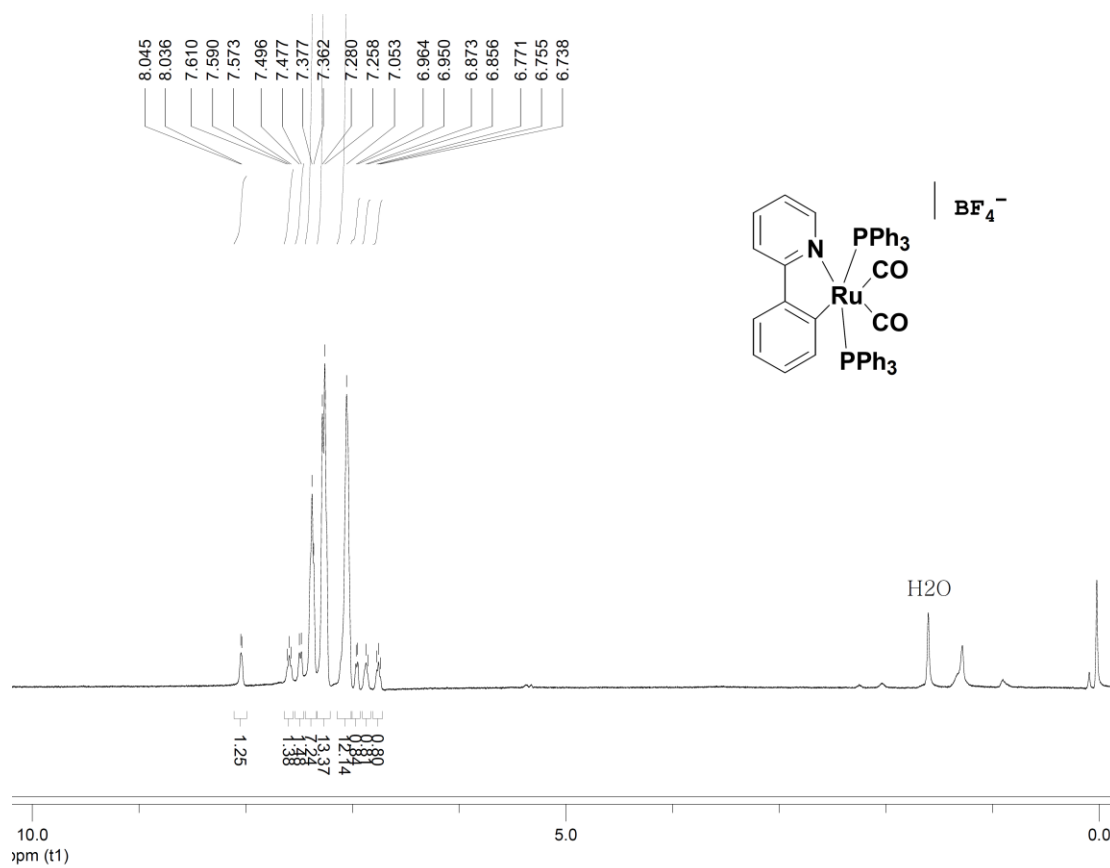

Figure S17. <sup>1</sup>H NMR spectrum of **5** in CDCl<sub>3</sub>

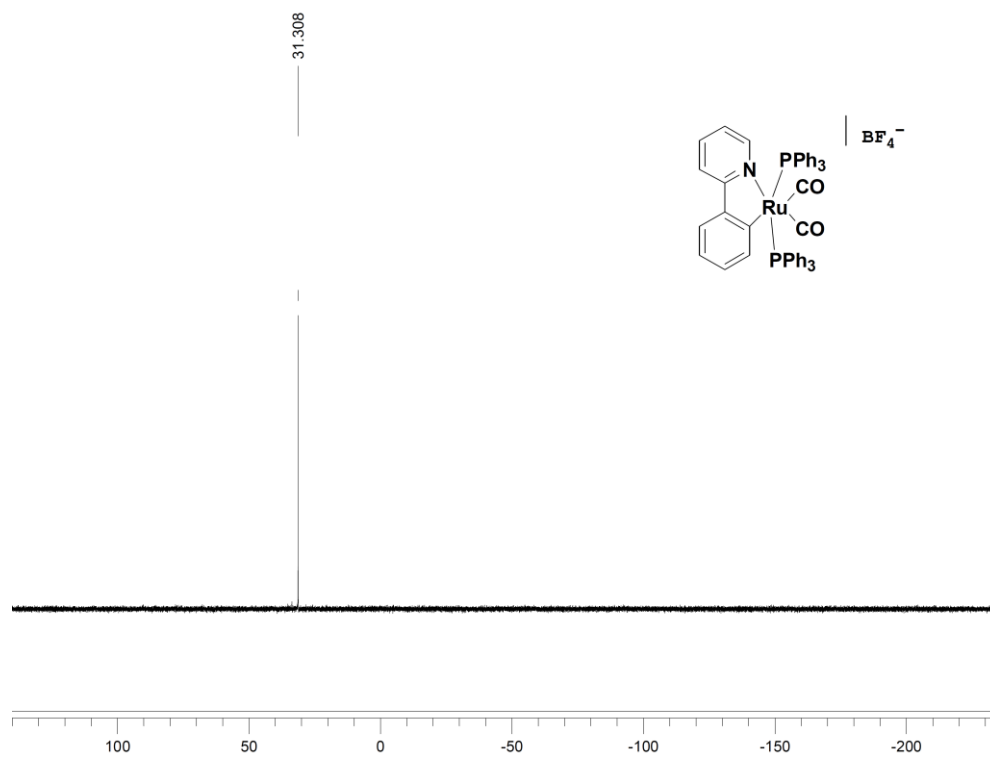

Figure S18. <sup>31</sup>P{<sup>1</sup>H} NMR spectrum of **5** in CDCl<sub>3</sub>.



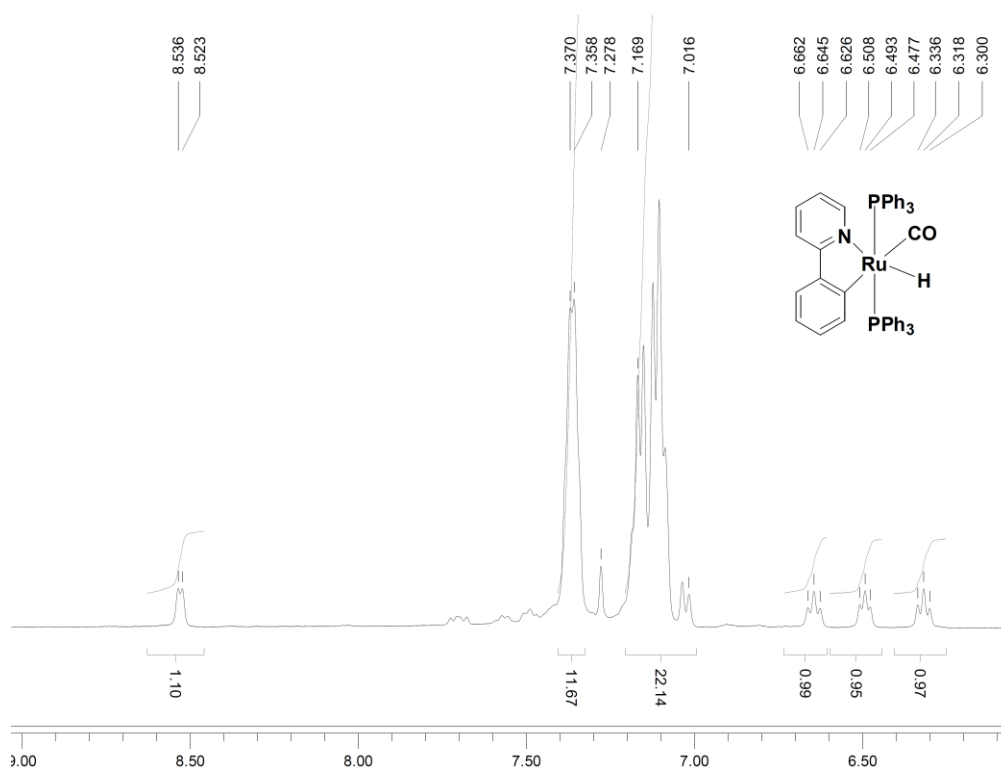

Figure S20-2. <sup>1</sup>H NMR spectrum of **6** in CDCl<sub>3</sub> (the region without Ru-H).

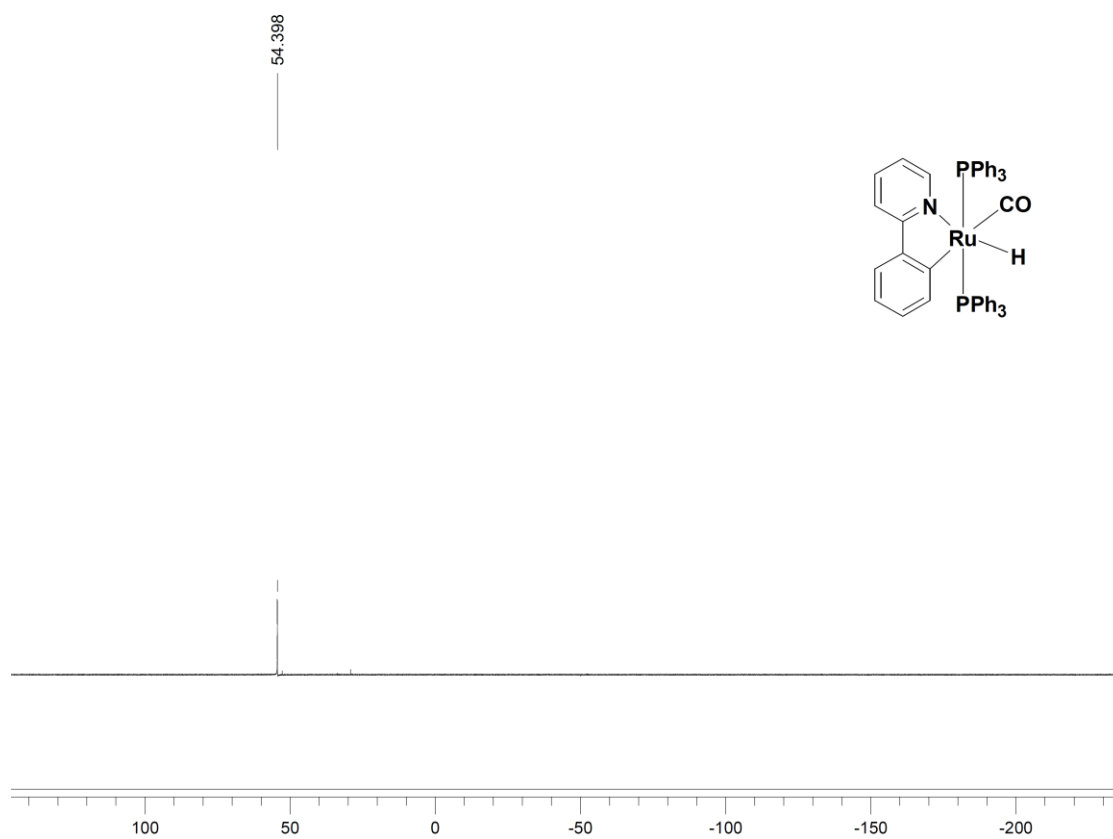

Figure S21. <sup>31</sup>P{<sup>1</sup>H} NMR spectrum of **6** in CDCl<sub>3</sub>.

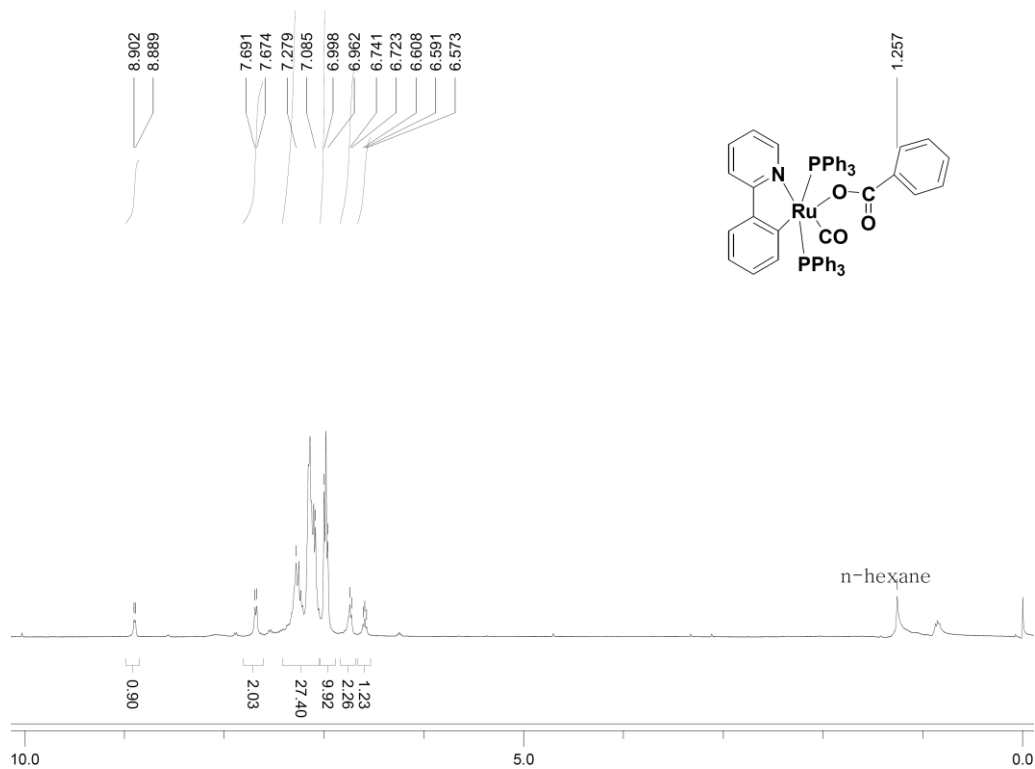

Figure S22. <sup>1</sup>H NMR spectrum of **7** in CDCl<sub>3</sub>

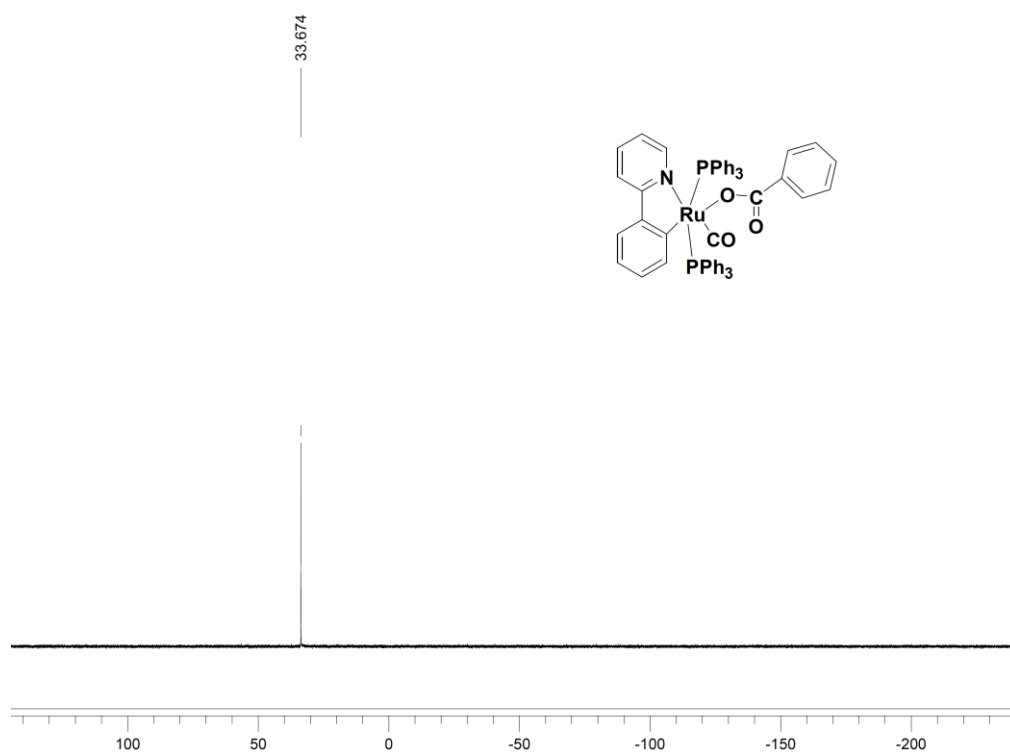

Figure S23. <sup>31</sup>P{<sup>1</sup>H} NMR spectrum of **7** in CDCl<sub>3</sub>.

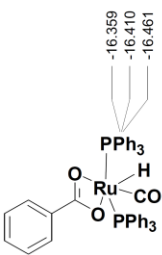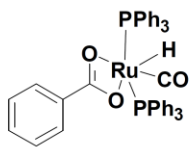

S16

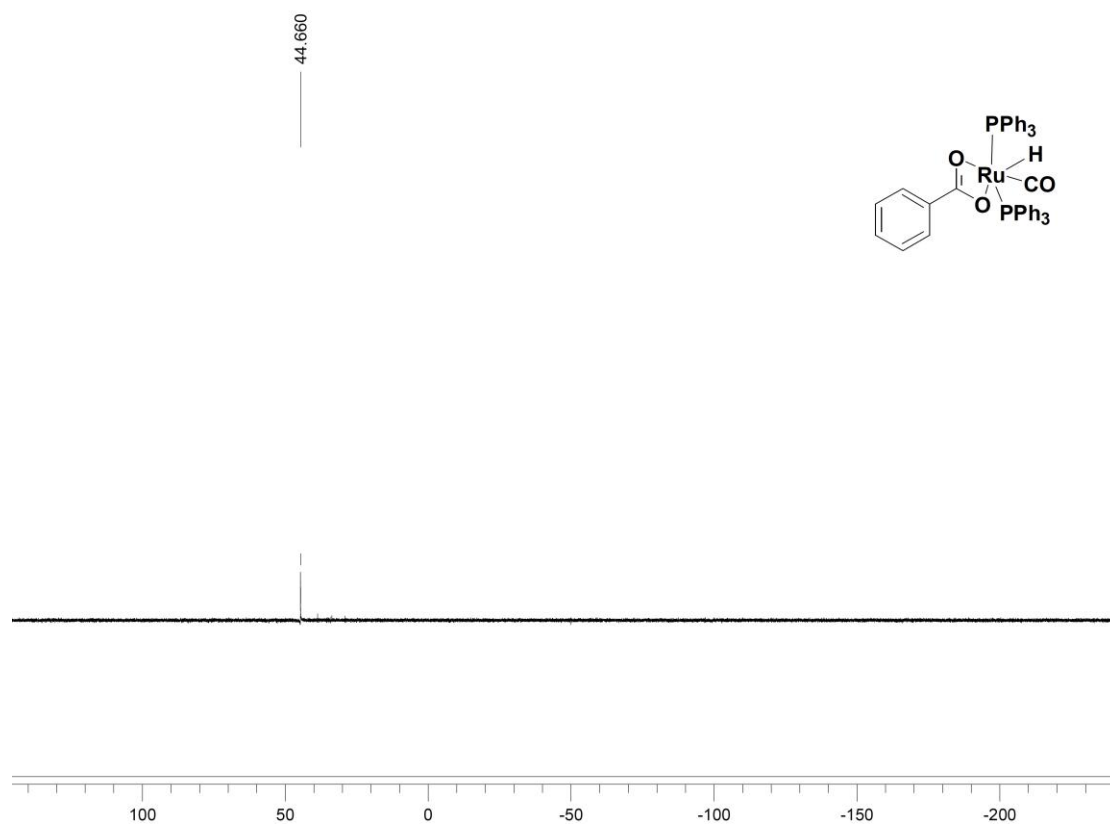

Figure S25.  $^{31}\text{P}\{^1\text{H}\}$  NMR spectrum of **8** in  $\text{CDCl}_3$ .

## $^1\text{H}$ NMR Spectra of the Carboxylic Acids

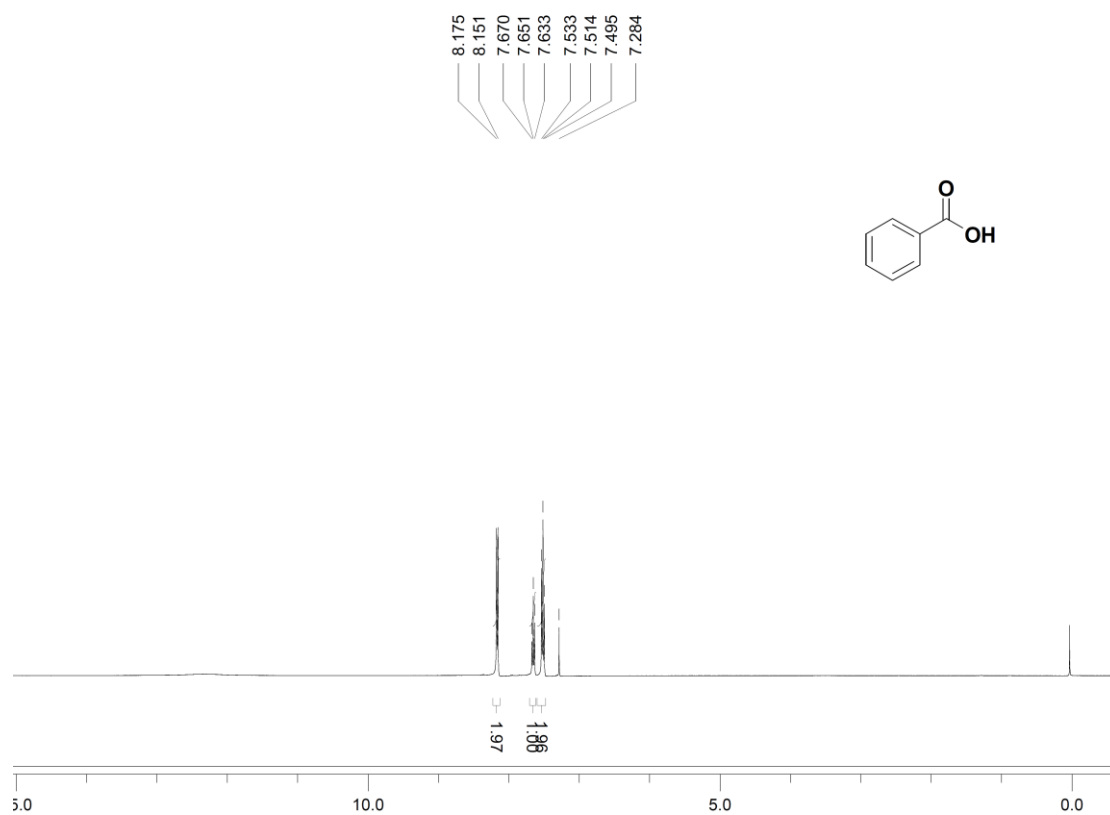

Figure S26.  $^1\text{H}$  NMR spectrum of benzoic acid in  $\text{CDCl}_3$

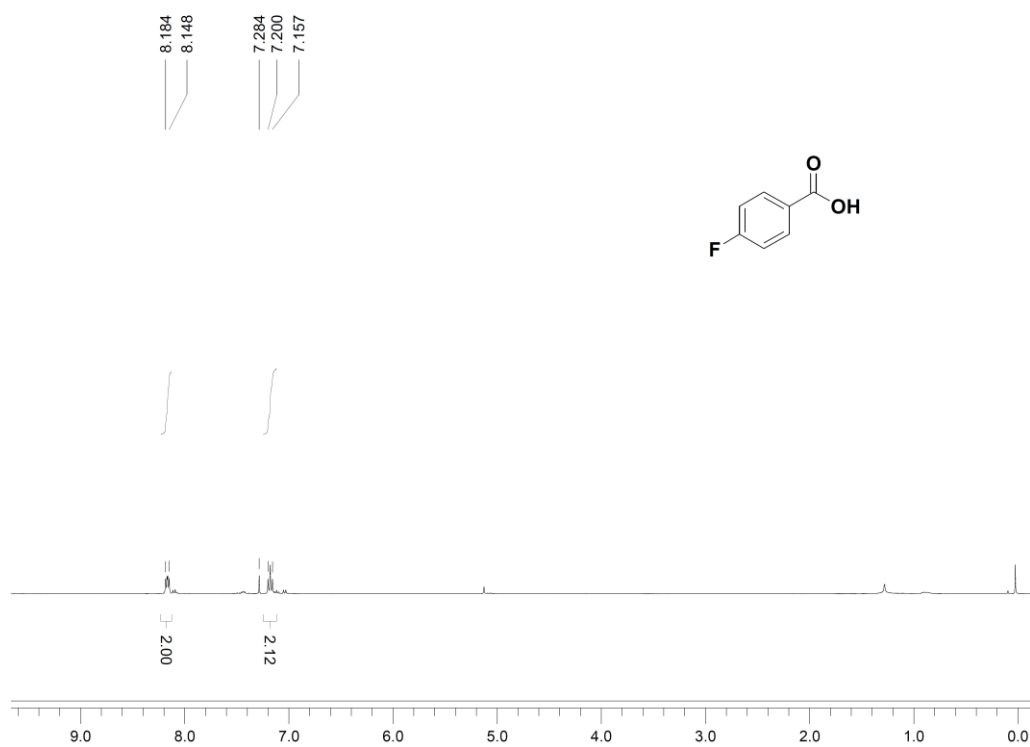

Figure S27. <sup>1</sup>H NMR spectrum of 4-fluorobenzoic acid in CDCl<sub>3</sub>

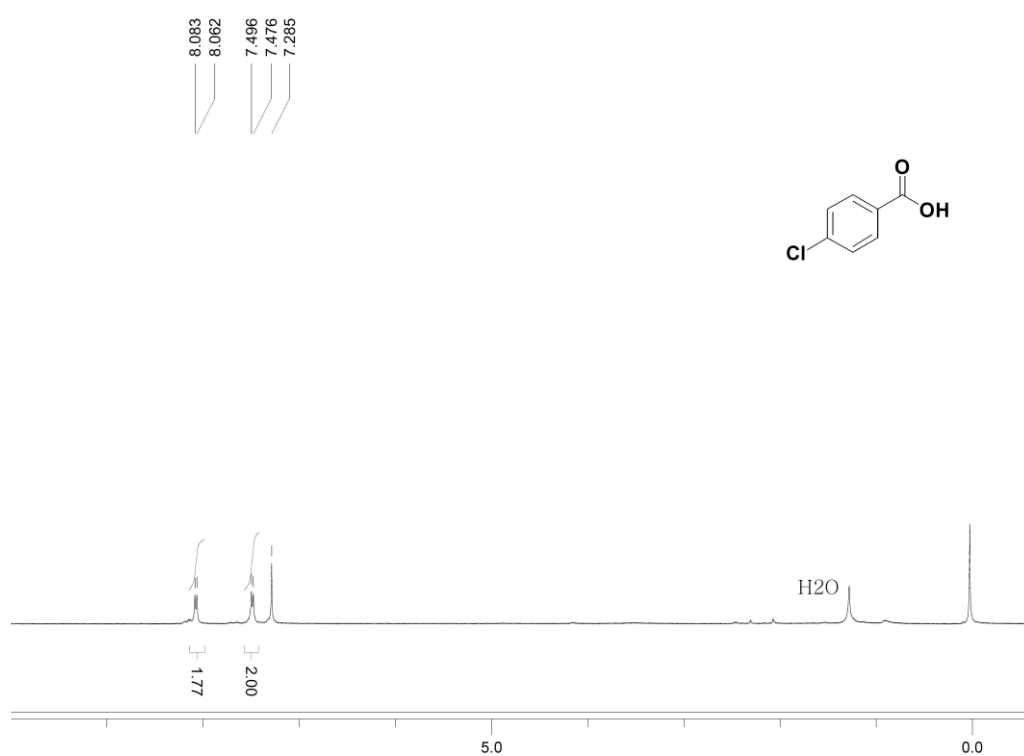

Figure S28. <sup>1</sup>H NMR spectrum of 4-chlorobenzoic acid in CDCl<sub>3</sub>

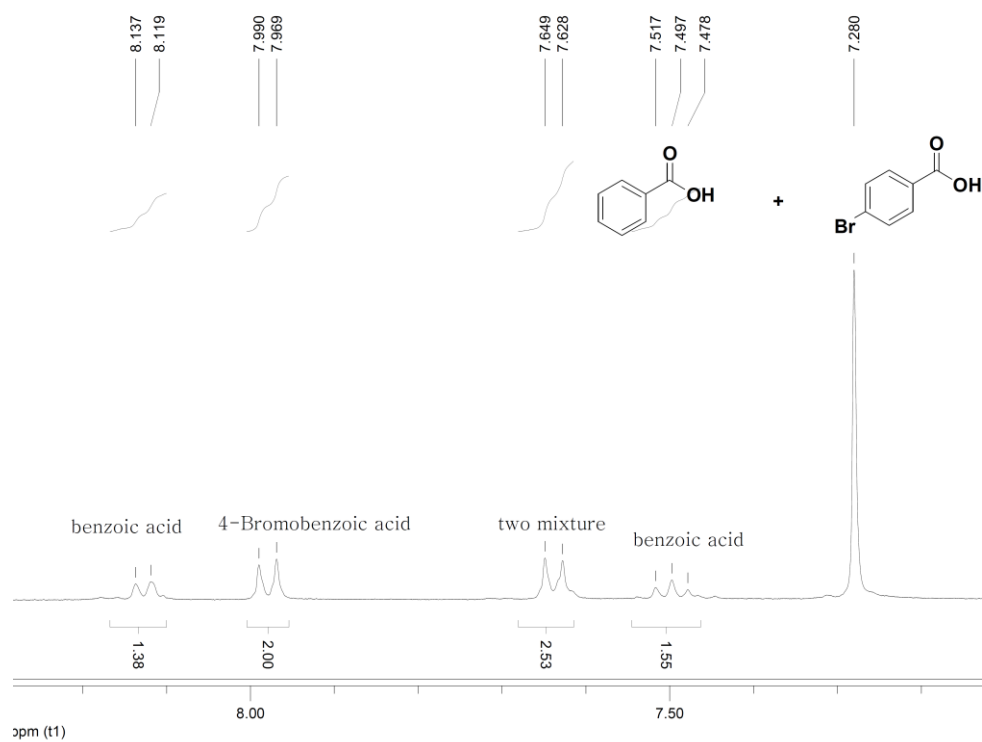

Figure S29.  $^1\text{H}$  NMR spectrum of 4-bromobenzoic acid in  $\text{CDCl}_3$

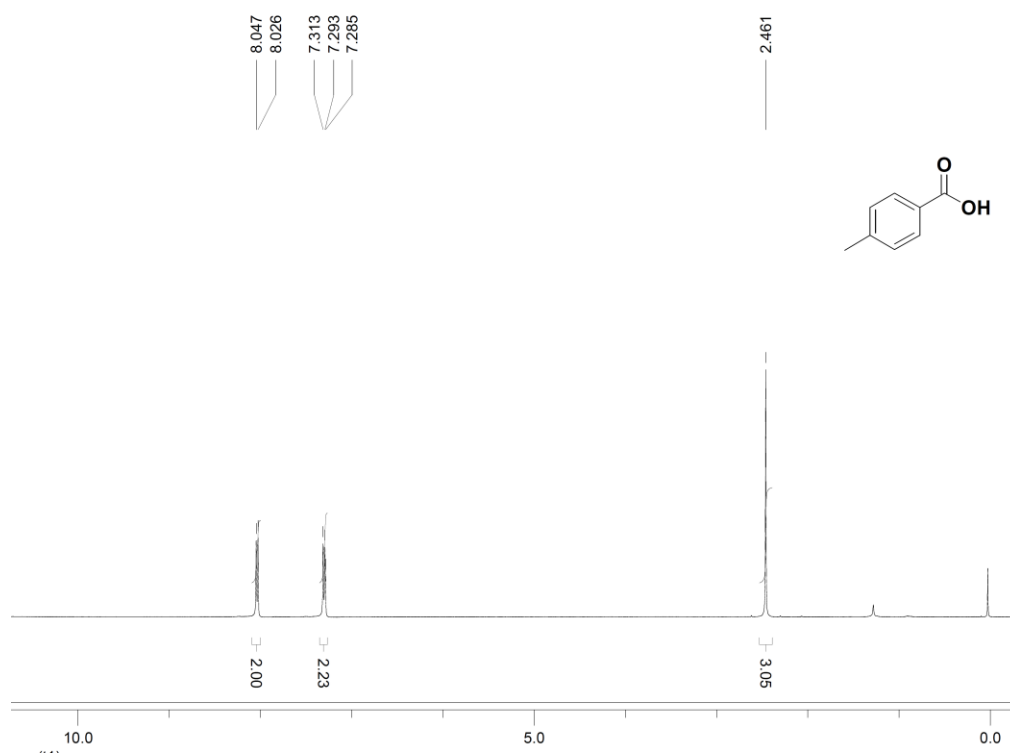

Figure S30.  $^1\text{H}$  NMR spectrum of 4-methylbenzoic acid in  $\text{CDCl}_3$

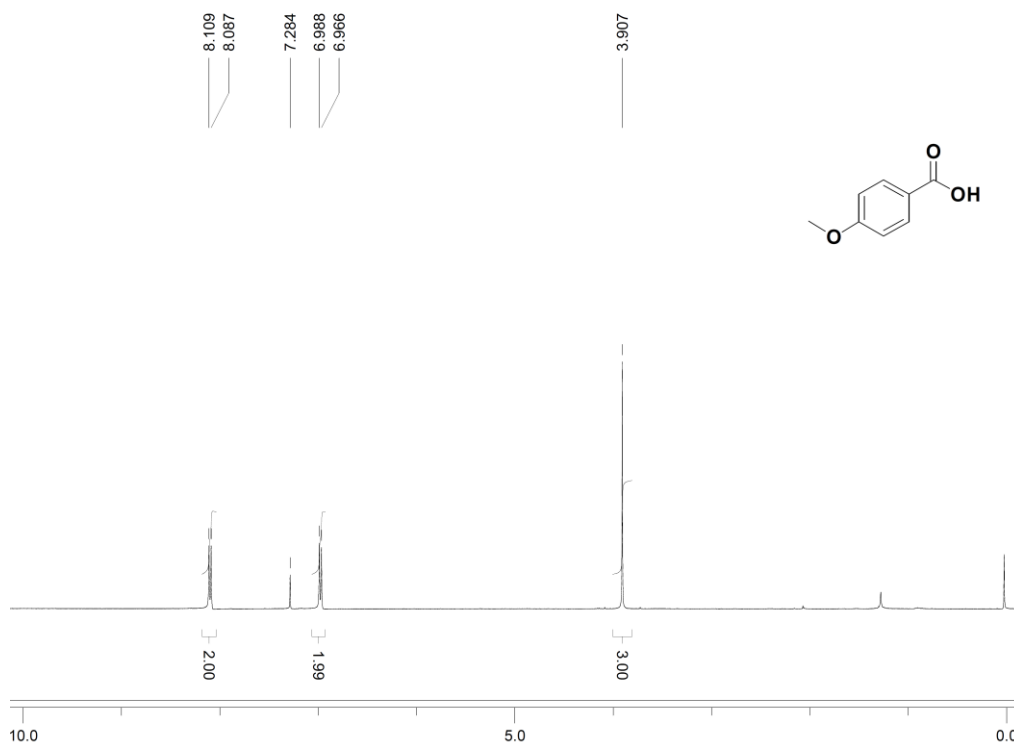

Figure S31. <sup>1</sup>H NMR spectrum of 4-methoxybenzoic acid in CDCl<sub>3</sub>

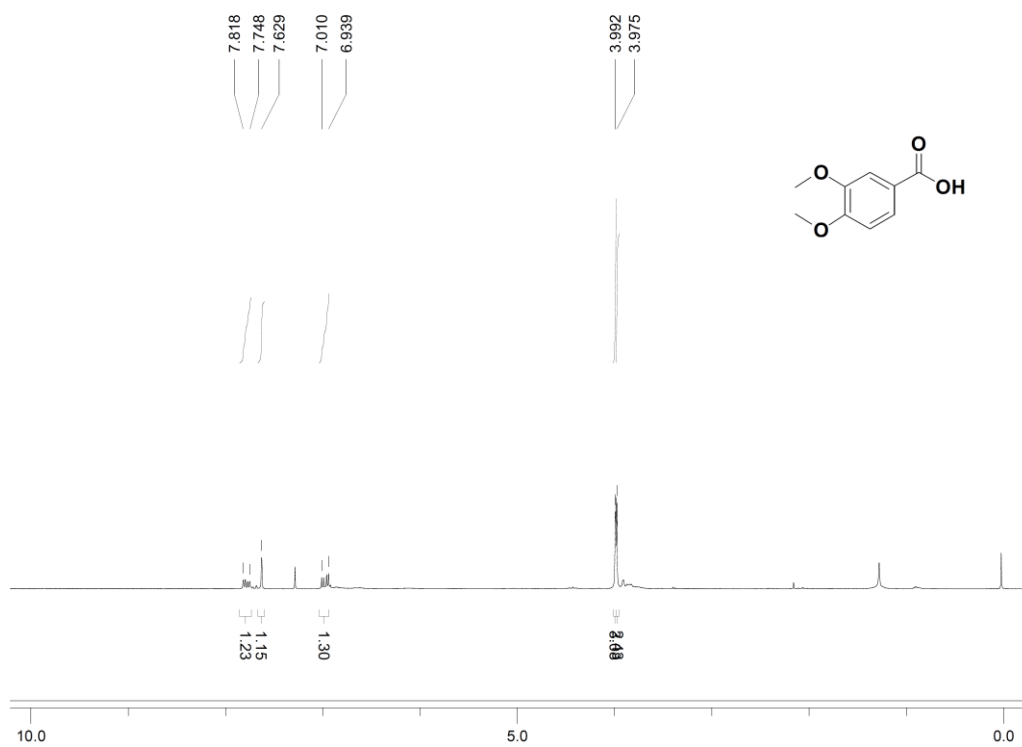

Figure S32. <sup>1</sup>H NMR spectrum of 3,4-Dimethoxybenzoic acid in CDCl<sub>3</sub>

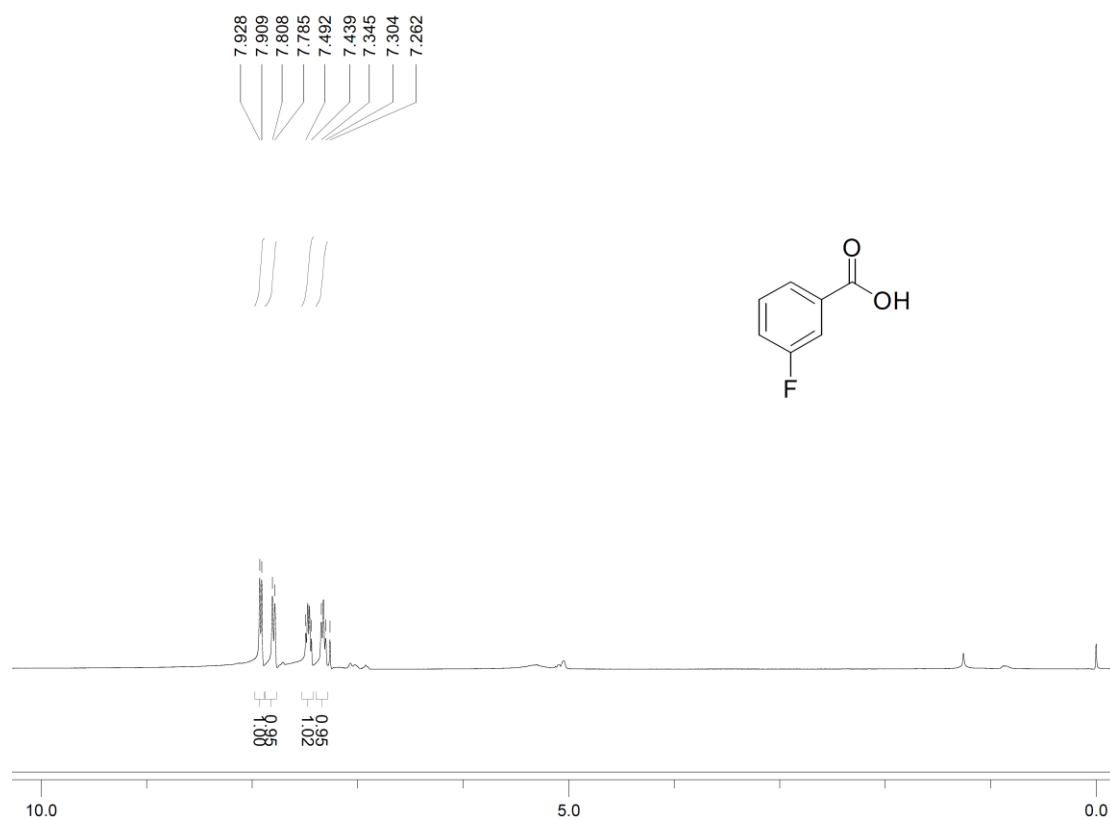

Figure S33. <sup>1</sup>H NMR spectrum of 3-fluorobenzoic acid in CDCl<sub>3</sub>

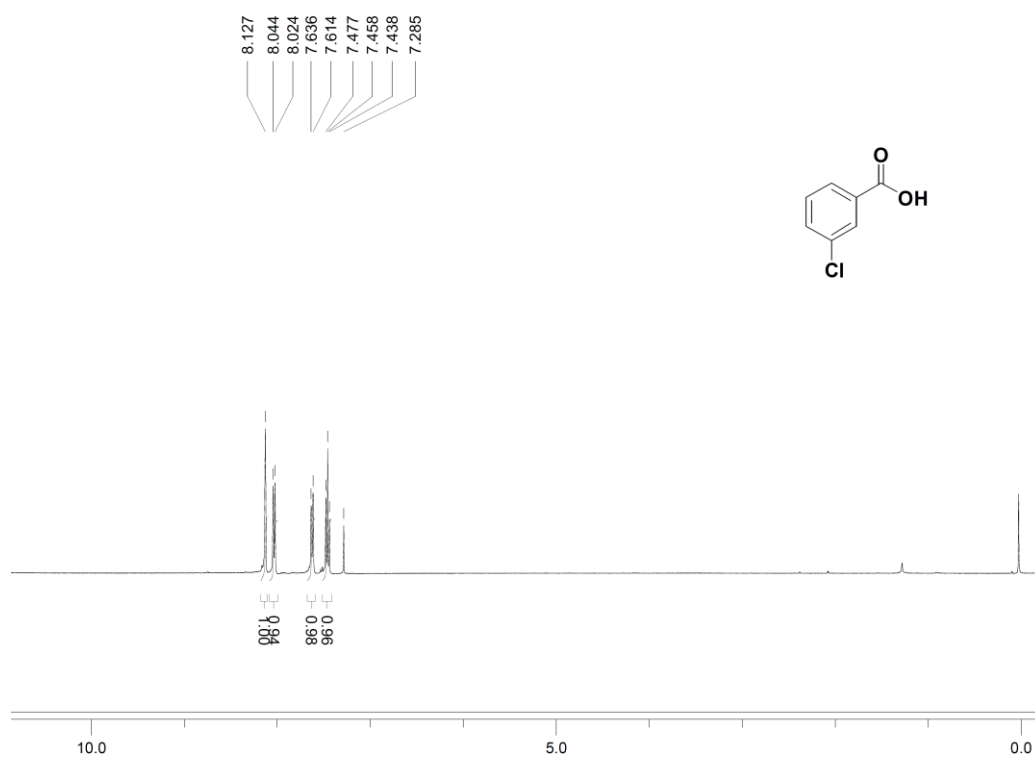

Figure S34. <sup>1</sup>H NMR spectrum of 3-chlorobenzoic acid in CDCl<sub>3</sub>

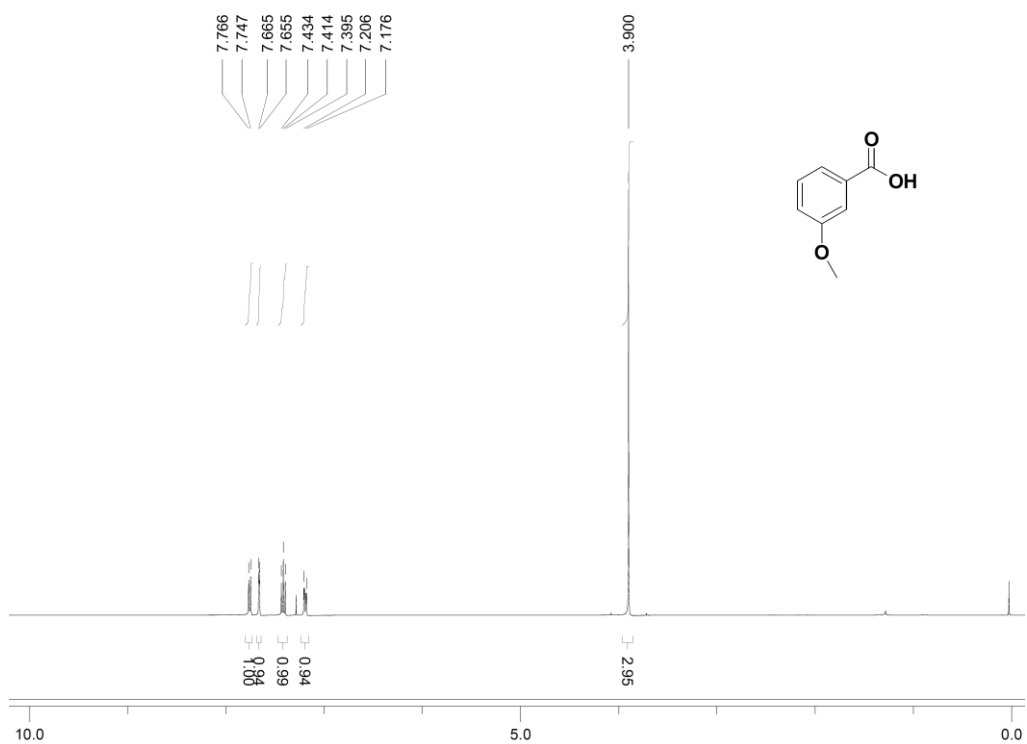

Figure S35. <sup>1</sup>H NMR spectrum of 3-methoxybenzoic acid in CDCl<sub>3</sub>

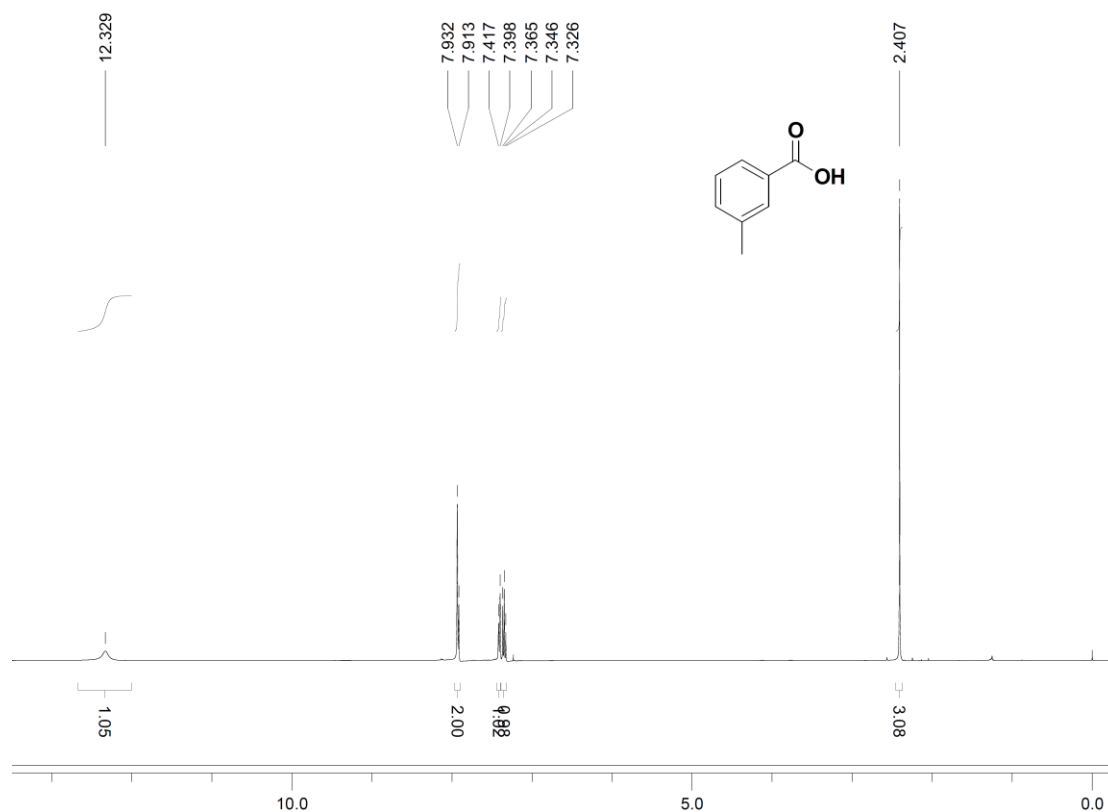

Figure S36. <sup>1</sup>H NMR spectrum of 3-methylbenzoic acid in CDCl<sub>3</sub>

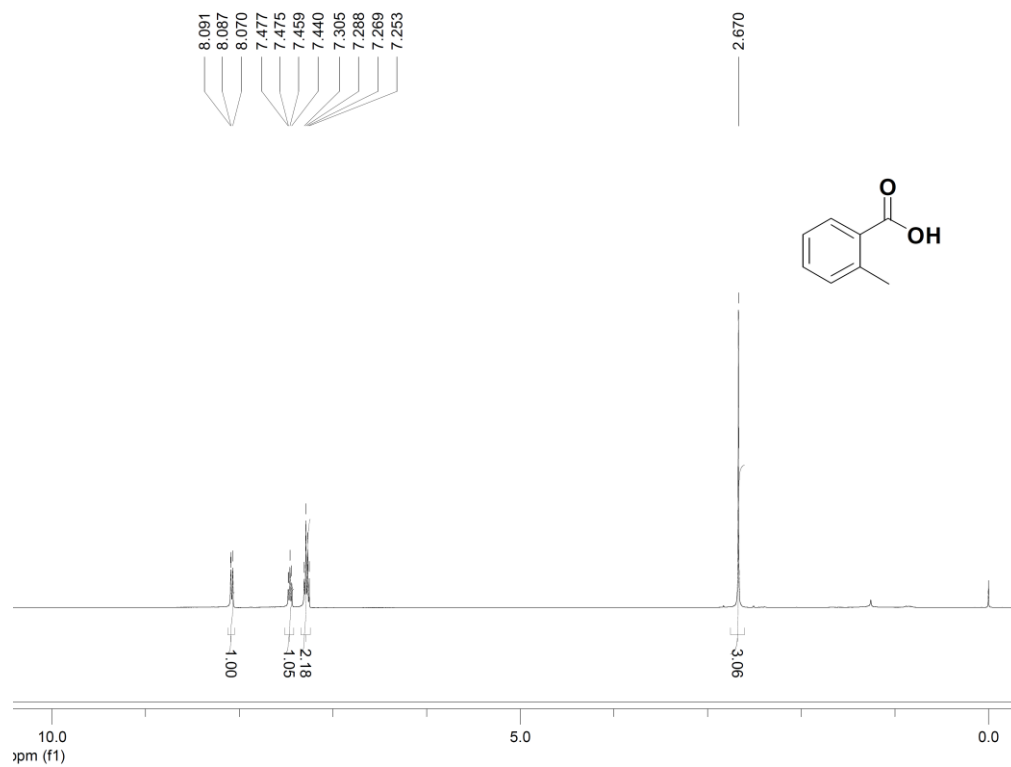

Figure S37. <sup>1</sup>H NMR spectrum of 2-methylbenzoic acid in CDCl<sub>3</sub>

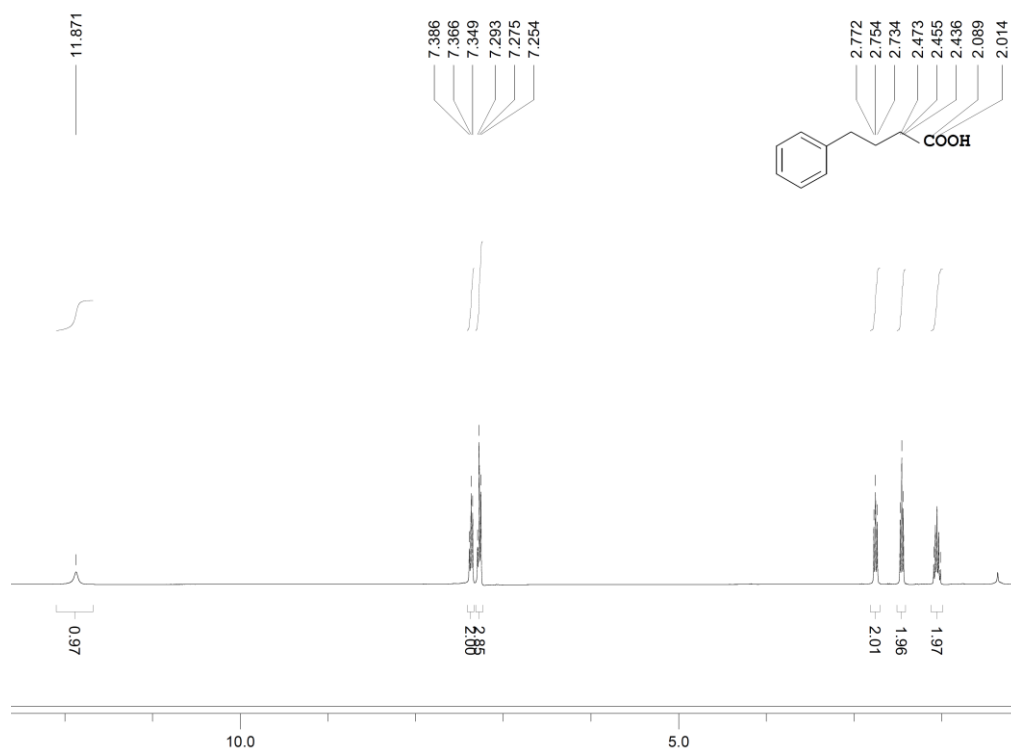

Figure S38. <sup>1</sup>H NMR spectrum of 4-phenylbutyric acid in CDCl<sub>3</sub>

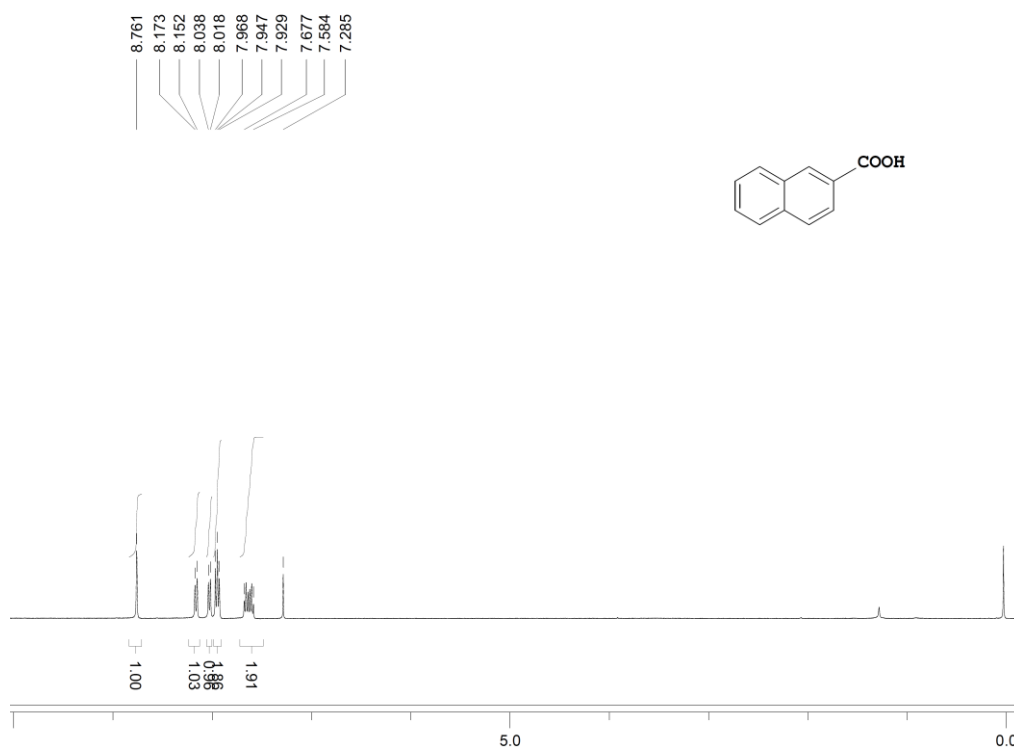

Figure S39. <sup>1</sup>H NMR spectrum of naphthalene-2-carboxylic acid in CDCl<sub>3</sub>

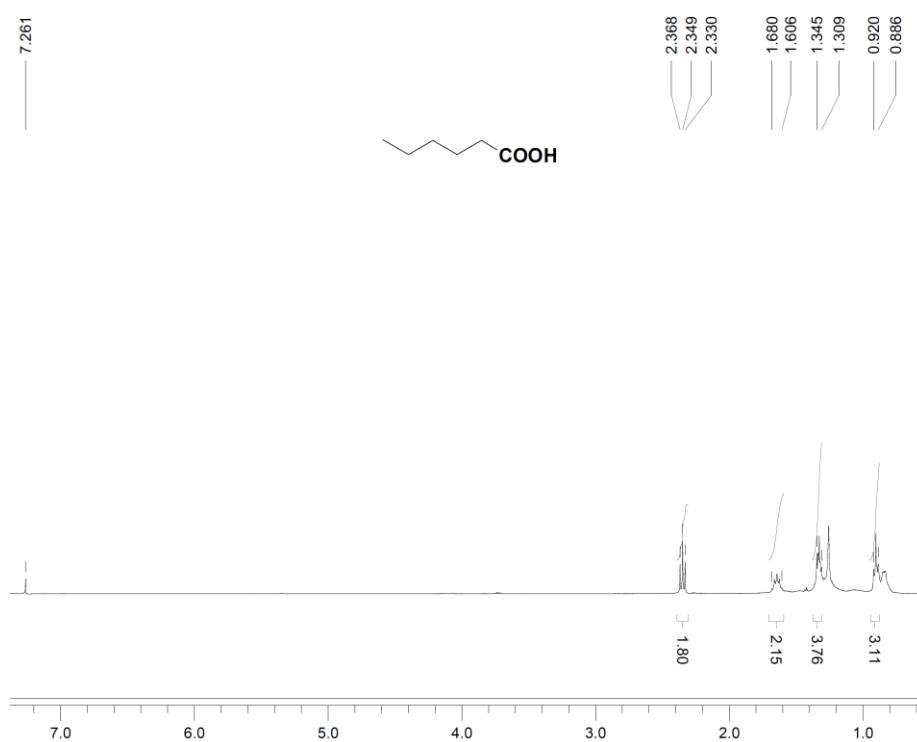

Figure S40. <sup>1</sup>H NMR spectrum of n-hexanoic acid in CDCl<sub>3</sub>

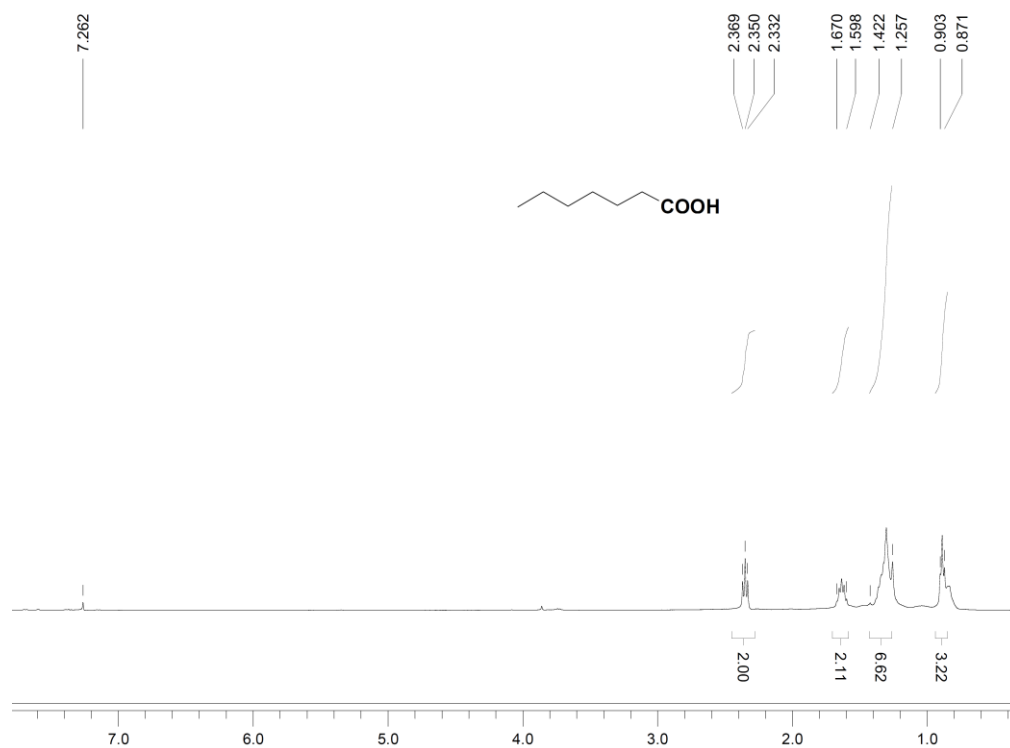

Figure S41. <sup>1</sup>H NMR spectrum of n-hepanoic acid in CDCl<sub>3</sub>
